# Supplementary material for: Changes in high-intensity precipitation on the northern Apennines (Italy) as revealed by multidisciplinary data over the last 9000 years
Source: Copernicus journal article supplement (doi:10.5194/cp-16-1547-2020), 2020-08-19
Supplement: Supplementary file 1 [file cp-16-1547-2020-supplement.pdf]

Supplement of *Clim. Past*, 16, 1547–1564, 2020  
<https://doi.org/10.5194/cp-16-1547-2020-supplement>  
© Author(s) 2020. This work is distributed under  
the Creative Commons Attribution 4.0 License.

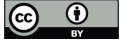

*Supplement of*

## **Changes in high-intensity precipitation on the northern Apennines (Italy) as revealed by multidisciplinary data over the last 9000 years**

**Stefano Segadelli et al.**

*Correspondence to:* Federico Grazzini ([fgrazzini@arpae.it](mailto:fgrazzini@arpae.it))

The copyright of individual parts of the supplement might differ from the CC BY 4.0 License.

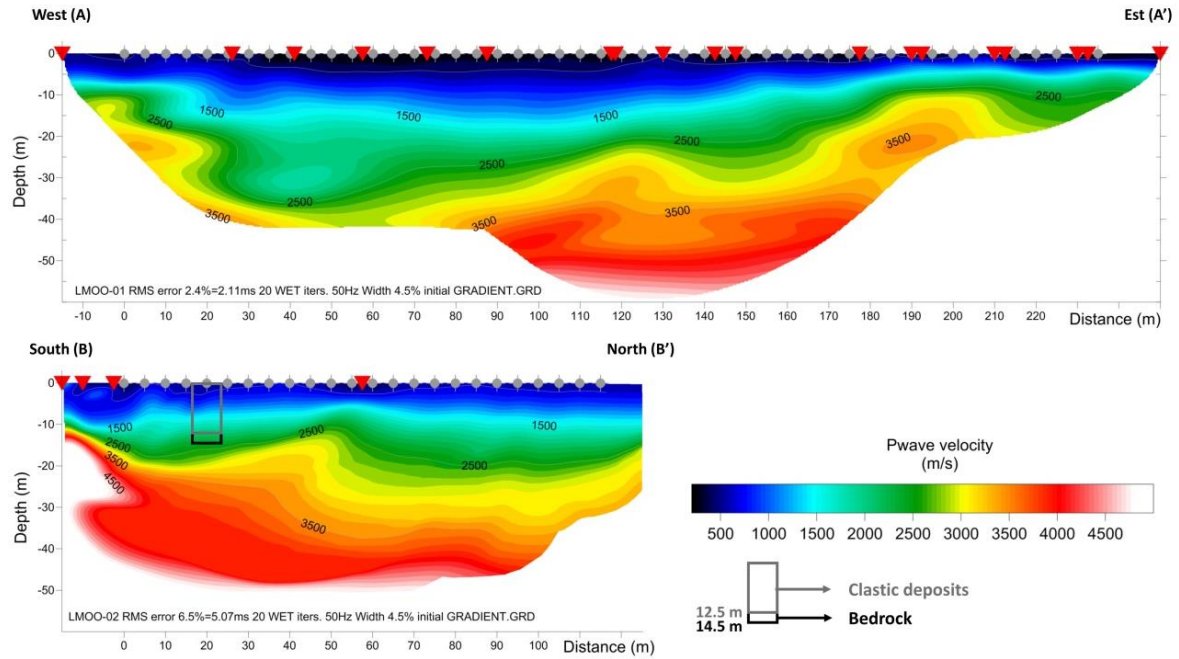

**Figure SUP1.** Seismic tomography of the underground lake Moo basin. For geophysical surveys tracks see Fig.2.

| Lab. code | Core code | Core depth (cm) | Material                                                        | Conventional age (year BP)                                   | Calibrated age BP ( $\pm 2$ sigma) | Calibrated range BC/AD ( $\pm 2$ sigma)                               |
|-----------|-----------|-----------------|-----------------------------------------------------------------|--------------------------------------------------------------|------------------------------------|-----------------------------------------------------------------------|
| LTL17681A | S1        | 113             | Peaty deposit                                                   | 82 $\pm$ 45                                                  | 149-11                             | 1680AD (29.4%) 1764AD<br>1801AD (66.0%) 1939AD                        |
| LTL18275A | S2        | 237             | Plant fragments (not determinable)                              | 178.69 $\pm$ 0.55<br>pMC                                     | -                                  | after 1950AD                                                          |
| LTL18275A | S3        | 233-237         | Peaty deposit                                                   | It was not possible to date, poor presence of organic matter | -                                  | -                                                                     |
| LTL18274A | S4        | 279-281         | Plant fragments (not determinable)                              | 80 $\pm$ 40                                                  | 146-14                             | 1681AD (26.5%) 1737AD<br>1804AD (68.9%) 1936AD                        |
| LTL18575A | S5        | 310-314         | Plant fragments (not determinable)                              | 102.12 $\pm$ 0.50                                            | -                                  | -                                                                     |
| LTL17682A | S6        | 455             | <i>Pinus</i> wood fragments (small twigs)                       | 3659 $\pm$ 45                                                | 4094-3861                          | 2194BC (2.2%) 2175BC<br>2144BC (93.2%) 1911BC                         |
| LTL18273A | S7        | 500-502         | Peaty deposit                                                   | 4779 $\pm$ 45                                                | 5599-5455                          | 3649BC (85.7%) 3505BC<br>3427BC (9.7%) 3380BC                         |
| LTL18277A | S8        | 760             | Peaty deposit including small wood fragments (not determinable) | 5686 $\pm$ 45                                                | 6573-6396                          | 4683BC (6.0%) 4631BC<br>4623BC (87.6%) 4446BC<br>4418BC (1.8%) 4400BC |
| LTL18278A | S9        | 860-865         | <i>Abies alba</i> wood fragments (small twigs)                  | 6065 $\pm$ 45                                                | 7027-6785                          | 5205BC (4.1%) 5165BC<br>5077BC (91.3%) 4835BC                         |
| LTL18276A | S10       | 930-933         | <i>Abies alba</i> wood fragments (small twigs)                  | 6518 $\pm$ 45                                                | 7420-7241                          | 5559BC (95.4%) 5373BC<br>5266BC (6.6%) 5228BC                         |
| LTL18272A | S12       | 959             | Peaty deposit                                                   | 159.33 $\pm$ 0.48<br>pMC                                     | -                                  | after 1950AD                                                          |
| LTL17683A | S13       | 1044            | Plant fragments (not determinable)                              | 8600 $\pm$ 45                                                | 9672-9501                          | 7722BC (95.4%) 7551BC                                                 |

**Table TS1** Full list of Radiocarbon sample age and description details.
